1 **Impact of Vaccination Rates, Pre-Pandemic Life Expectancy, Economic**

2 **Status and Age on COVID-19 Excess Mortality Across United States**

3 Olga Matveeva<sup>1\*</sup>; Aleksey Y. Ogurtsov<sup>2</sup>; and Svetlana A. Shabalina<sup>2\*</sup>

4 <sup>1</sup>Sendai Viralytics LLC, Acton, MA 01720, USA.

5 <sup>2</sup>National Center for Biotechnology Information, National Library of Medicine, National Institutes of  
6 Health, Bethesda, MD 20894-6075, USA.

7 \*Corresponding authors: [olga.matveeva@gmail.com](mailto:olga.matveeva@gmail.com); [shabalin@ncbi.nlm.nih.gov](mailto:shabalin@ncbi.nlm.nih.gov)

## 8 **Abstract**

9 **Aim:** This study investigates factors influencing pandemic mortality rates across U.S. states during  
10 different waves of SARS-CoV-2 infection from February 2020 to April 2023, given that over one  
11 million people died from COVID-19 in the country.

12 **Methods:** We performed statistical analyses and used linear regression models to estimate age-adjusted  
13 and unadjusted excess mortality as functions of life expectancy, vaccination rates, and GDP per capita  
14 in U.S. states.

15 **Results and Discussion:** States with lower life expectancy and lower GDP per capita experienced  
16 significantly higher mortality rates during the pandemic, underscoring the critical role of underlying  
17 health conditions and healthcare infrastructure, as reflected in these factors. When categorizing states  
18 by vaccination rates, significant differences in GDP per capita and pre-pandemic life expectancy  
19 emerged between states with lower and higher vaccination rates, likely explaining mortality disparities  
20 before mass vaccination. During the Delta and Omicron BA.1 waves, when vaccines were widely  
21 available, the mortality gap widened, and states with lower vaccination rates experienced nearly double  
22 the mortality compared to states with higher vaccination rates (Odds Ratio 1.8, 95% CI 1.7-1.9,  $p <$   
23  $0.01$ ). This disparity disappeared during the later Omicron variants, likely because the levels of  
24 combined immunity from vaccination and widespread infection across state populations became  
25 comparable. We showed that vaccination rates were the only significant factor influencing age-adjusted  
26 mortality, highlighting the substantial impact of age-specific demographics on both life expectancy and  
27 GDP across states.

28 **Conclusion:** The study underscores the critical role of high vaccination rates in reducing excess deaths  
29 across all states, regardless of economic status. Vaccination rates proved more decisive than GDP per  
30 capita in reducing excess deaths. Additionally, states with lower pre-pandemic life expectancy faced  
31 greater challenges, reflecting the combined effects of healthcare quality, demographic variations, and  
32 social determinants of health. These findings call for comprehensive public health strategies that  
33 address both immediate interventions, like vaccination, and long-term improvements in healthcare  
34 infrastructure and social conditions.

35 **Keywords:** Vaccination Rate, Life expectancy, Pandemic Excess Mortality, Age-specific  
36 Adjustment, COVID-19, Gross Domestic Product

37

## 38 **Introduction**

39 In May 2023, the U.S. Centers for Disease Control and Prevention (CDC) and the World Health  
40 Organization (WHO) officially declared the end of the COVID-19 pandemic as a public health  
41 emergency. However, despite the decline in COVID-19 infections, persistent morbidity, and mortality,  
42 coupled with the looming threat of future significant outbreaks, necessitate a thorough examination of  
43 the effectiveness of past pandemic control strategies. Numerous studies confirm the effectiveness of  
44 COVID-19 vaccination in reducing deaths across US states (1-4). State-level analyses reveal that high  
45 vaccination rates are associated with a lower risk of hospitalization due to COVID-19 (4) and fewer  
46 overall hospitalizations (2) estimated that vaccination prevented roughly 5,000 hospitalizations and  
47 saved approximately 700 lives per 100,000 people in the US (5).

48 A sustained reduction in mortality rates, along with an increase in vaccination coverage, has  
49 been observed across states throughout the Alpha, Delta, and Omicron waves of the pandemic (6).  
50 Notably, a 10% increase in vaccination coverage was linked to an 8% decrease in mortality and a 7%  
51 decrease in COVID-19 cases (7). It has been observed that the 10 states with the highest vaccination  
52 rates had all-cause mortality rates comparable to, or even lower than, some European countries during  
53 the combined Delta and Omicron waves (3). Thus, research suggests significant geographical  
54 disparities in vaccination coverage across the US, with areas of low vaccination identified as “cold  
55 spots” (8). This unequal access to vaccination may be linked to variations in healthcare capacity.

56 The research team led by Bollyky et al. (9) conducted a comprehensive analysis of the factors  
57 influencing the impact of the COVID-19 pandemic in the US. They found that socioeconomic factors  
58 such as low poverty levels, higher education, and trust in institutions were linked to lower death rates.  
59 Conversely, states with higher percentages of minority populations experienced higher death rates.

60 Access to quality healthcare was shown to reduce deaths and infections, while increased public health  
61 spending and personnel did not significantly affect outcomes.

62 While the Bollyky et al. (2023) study (9) found no direct correlation between state Gross  
63 Domestic Product (GDP) per capita and pandemic age-adjusted mortality within the US, lower GDP is  
64 often associated with challenges in healthcare infrastructure, resource availability, and social support  
65 systems. These limitations may indirectly contribute to higher overall pandemic mortality rates.  
66 Globally, studies have shown a link between low excess mortality, high vaccination rates, and high  
67 GDP (10-12). However, the complex interplay of these factors and the mechanisms by which they  
68 affected pandemic mortality in the US context remains understudied. Our comprehensive analysis  
69 across all 50 states addresses this gap by examining the relationship between age-adjusted and  
70 unadjusted pandemic mortality estimates, vaccination rates, and socioeconomic factors (including GDP  
71 per capita and pre-pandemic life expectancy).

72 For this analysis, we chose to assess excess mortality because it provides a more comprehensive  
73 measure of the overall impact of the pandemic than reported COVID-19 deaths alone. It accounts for  
74 both direct COVID-19 fatalities and indirect effects such as disruptions in healthcare systems, delayed  
75 medical treatments, and other socioeconomic impacts.

76 We also analyzed the relationship between pre-pandemic life expectancy and pandemic  
77 mortality. So far, we have been unable to find published studies that directly investigate this relationship  
78 and the mechanisms underlying it. The main research focus of published research is on addressing the  
79 question of how the pandemic has shortened life expectancy in different jurisdictions internationally  
80 (13) and within the USA (14). However, accounting for state-specific pre-pandemic life expectancy  
81 when analyzing pandemic mortality is important because life expectancy captures and integrates the  
82 impact of underlying health conditions, healthcare quality, and demographic differences, such as age

83 distribution, which influence vulnerability to pandemics. It also highlights differences in healthcare  
84 infrastructure and social determinants of health, such as income and access to care, which can  
85 exacerbate mortality rates.

86 This study takes statistical approaches by simultaneously considering many factors in  
87 univariable and multivariable regression analysis along with partial correlation estimates.

88 By integrating both vaccination rates and economic indicators, this research seeks to shed light  
89 on the intricate dynamics influencing excess mortality, paving the way for more effective and targeted  
90 public health interventions. Furthermore, investigating the relationship between pandemic mortality  
91 and life expectancy across U.S. states can yield valuable insights into how the pandemic has  
92 disproportionately impacted different populations within the United States.

## 93 **Materials and Methods**

### 94 *Life expectancy*

95 Life expectancy at birth estimated for 2019 for US states was extracted from US Mortality Database  
96 (15).

### 97 *Total pandemic age-adjusted and unadjusted pandemic mortality from the earlier published study*

98 Age-adjusted and unadjusted COVID-19 pandemic mortality estimates for each U.S. state,  
99 spanning January 1, 2020, to July 31, 2022, were derived from a previously published study (9). In  
100 addition we also used excess mortality estimates (age-unadjusted) derived from CDC modelling as  
101 described below.

### 102 *Excess mortality derived from CDC modeling*

103 Data on excess mortality in the United States were also sourced from the US Centers for Disease  
104 Control and Prevention (CDC) (16). We downloaded the file "National and State Estimates of Excess

105 Deaths" for our analysis. To ensure proper comparisons, we normalized the absolute values of excess  
106 mortality for each specific period using the population size of each state obtained from the United States  
107 Census Bureau's 2020 data (17). For this normalization process, we used the file "Annual Estimates of  
108 the Resident Population for the United States, Regions, States, District of Columbia, and Puerto Rico:  
109 April 1, 2020, to July 1, 2022."

110 CDC's method for calculating excess deaths involves a modeling approach that compares recent  
111 mortality data to historical trends dating back to 2013 (18). This analysis aims to identify significant  
112 increases in all-cause mortality.

### 113 ***Vaccination dataset***

114 Vaccination data for the United States was also procured from the US Centers for Disease  
115 Control and Prevention (CDC) (19). We downloaded the file "COVID-19 Vaccinations in the United  
116 States, Jurisdiction" and extracted data that were relevant to the dates October 2, 2021, and January 2,  
117 2022, from the column "titled "Series\_Complete\_Pop\_Pct" and booster doses from the column titled  
118 "Additional\_Doses\_Vax\_Pct". Information about the file is available in CDC (19). Additionally, we  
119 included a dataset on the state's annual per capita gross domestic product (GDP) per capita for 2020  
120 and 2021. We obtained this dataset from the Bureau of Economic Analysis (20), and used the file  
121 "Annual GDP by State and Industry".

### 122 ***Vaccination hesitancy***

123 Data were obtained from Office of Assistant Secretary for Planning and Evaluation (ASPE)  
124 (21). The file titled "Predicted-Vaccine Hesitancy-by State, PUMA, and County" was used for the  
125 study.

### 126 ***Statistical analysis***

127 The time intervals for analysis were classified as follows:

128 I. Pre-Delta (February 1, 2020-June 30, 2021): This period represents the initial period of the pandemic  
129 before the emergence of the Delta variant.

130 II. Delta (July 1, 2021-January 31, 2022): The Delta variant was predominant, and mass vaccination  
131 was already underway. The Delta-Omicron transition happened in December/January 2022.

132 III. Omicron BA.1 (February 1, 2022-March 30, 2022): The specific period corresponds to prevalence  
133 of the first Omicron variant.

134 IV. Post-Omicron BA.1 (April 1, 2022-April 1, 2023): This interval covered the period after the  
135 emergence of the first Omicron variant. Summary information for statistical analysis from the  
136 specified databases for the indicated time intervals was presented in Supplementary Table 1.

137 All states were categorized based on real GDP per-capita in 2020 using the threshold that was  
138 chosen arbitrarily. States with GDP per-capita above \$65,000 were classified as higher-income, while  
139 those below \$65,000 were considered less affluent.

140 Statistical analysis, including Pearson correlation analysis, linear regression fitting, and Odds  
141 Ratio calculations, was performed using Excel functions. In addition, we validated the results using the  
142 online tool (22).

## 143 **Results**

### 144 *Complex interplay between pandemic mortality, life expectancy, GDP, and vaccination rates across* 145 *US States*

146 To understand the impact of age on excess pandemic mortality across U.S. states, we analyzed  
147 the relationship between age-adjusted and unadjusted estimates. We correlated these estimates with  
148 each other, with pre-pandemic state-specific life expectancy and annual GDP per capita values.  
149 Interestingly, life expectancy correlates better with unadjusted mortality (Figure 1A) compared to age-

150 adjusted mortality (Figure 1B). This suggests that states with lower life expectancy experienced higher  
151 overall mortality during the pandemic, likely due to factors such as poorer healthcare infrastructure,  
152 higher prevalence of chronic conditions, and other socioeconomic differences. However, age-  
153 adjustment diminishes this effect. This finding highlights the importance of pre-pandemic health, as  
154 measured by life expectancy, in determining a state's vulnerability to excess mortality during a  
155 pandemic. Age-adjustment partially mitigates this effect, suggesting that older populations are a  
156 significant contributing factor.

157 While the two mortality estimates age-adjusted and unadjusted are correlated with each other,  
158 this correlation is more pronounced for states with GDP per capita at or below \$65,000 (Figure 1C).  
159 This indicates that demographic factors play a substantial role in determining overall mortality in these  
160 states.

161 Interestingly, the strong correlation ( $R=-0.89$ ,  $p<0.05$ ) between pandemic age-unadjusted  
162 mortality and pre-pandemic life expectancy persists even when controlling for other variables,  
163 including vaccination and GDP, with partial correlations ranging between -0.87 and -0.84, as shown in  
164 Figure 1A. However, the partial correlation between age-adjusted mortality and life expectancy  
165 disappears when we control for vaccination rate (Figure 1B). This finding underscores the significant  
166 role of vaccination in influencing pandemic mortality outcomes, suggesting that vaccination efforts can  
167 effectively mitigate the impact of pre-existing health vulnerabilities, as reflected by life expectancy.

168 Additionally, not surprisingly, we noticed that states with lower GDP have lower pre-pandemic  
169 life expectancy. However, this effect is noticeable only for states with GDP at or below \$65,000. Thus,  
170 the correlation between these variables is significant ( $p < 0.05$ ) only for states within this subset (Figure  
171 1D). The relationship disappears for higher income states. This suggests a diminishing effect of income  
172 on life expectancy beyond a certain GDP threshold (around \$65,000 per capita in this study). Perhaps



173 other factors besides just wealth become more important determinants of health outcomes in high-  
174 income states.

175           Similar to the life expectancy relationship, the link between lower pandemic mortality and  
176 higher GDP is only significant for lower-GDP states (with a GDP per capita at or below \$65,000),  
177 suggesting that after reaching a certain threshold more economic resources doesn't necessarily translate  
178 to a bigger reduction in pandemic deaths. Interestingly, there is a nuance in the relationships between  
179 GDP and pandemic mortality depending on age-consideration. Thus, within this lower-GDP subset, the  
180 correlation with GDP is weaker for age-adjusted mortality compared to unadjusted mortality (refer to  
181 Supplementary Figures 1A and 1B). This suggests that factors other than economic resources might  
182 play a more significant role in affecting mortality rates when age structure of the population is  
183 considered.

#### 184 *Visualizing COVID-19 mortality waves and vaccination progress*

185           The relationship between mortality dynamics and the COVID-19 pandemic is highlighted by  
186 the successive waves of SARS-CoV-2 infections, driven by the emergence and dominance of distinct  
187 viral variants. Fatalities arise from both direct COVID-19 impact and broader effects. The interplay  
188 between the evolving viral genomes and host responses elucidates temporal patterns in morbidity and  
189 mortality observed across pandemic infection waves. Figure 2A visually depicts daily reported  
190 COVID-19 deaths, illustrating distinct waves of infection and periods dominated by specific variants.  
191 Supplementary Figure demonstrates the chronological dominance of these variants.

192           As a first step toward understanding pandemic disease dynamics and evaluating the  
193 effectiveness of vaccination efforts, excess mortality (non-adjusted for age) was calculated separately  
194 for the pre-Delta, Delta-Omicron BA.1, and post-Omicron BA.1 periods. These periods are marked  
195 with distinct colors in Figure 2A. In the next step of the analysis, we ranked the states according to their

196 vaccination rates and divided them into three categories, as shown in Figure 2B. The "fast" category  
197 included states in which the vaccination coverage for residents reached 60% by October 2, 2021, and  
198 70% by January 2, 2022. This category includes the states of Vermont, Connecticut, Maine, Rhode  
199 Island, Massachusetts, New Jersey, Maryland, and New York. The "slow" category includes states  
200 where more than half of the residents remained unvaccinated as of October 2, 2021. This category  
201 includes North Carolina, Montana, Indiana, Missouri, Oklahoma, South Carolina, Arkansas, Georgia,  
202 Louisiana, Tennessee, North Dakota, Mississippi, Alabama, Idaho, Wyoming, and West Virginia. The  
203 remaining states were categorized as having an intermediate vaccination rate.

204 States with higher pre-pandemic life expectancy also tended to have higher vaccination rates  
205 during the pandemic. Two parameters are highly and significantly correlated with each other ( $R=0.66$ ,  
206  $p<0.05$ ). This relationship may reflect underlying factors such as better healthcare infrastructure, public  
207 health policies, and health awareness that contribute to both higher life expectancy and greater vaccine  
208 uptake.

209 Finally, we integrated information pertaining to mortality and vaccination rates by calculating  
210 and illustrating the number of fatalities in each state based on its respective category and time intervals  
211 (Figure 2C).

212 ***Pronounced differences in excess mortality among state categories throughout successive pandemic***  
213 ***periods***

214 *States with higher vaccination rate tended to have lower mortality rates*

215 The interaction between excess mortality and vaccination rates throughout the pandemic were  
216 analyzed using data from different state categories across three distinct time periods. During the first  
217 pre-Delta period (time interval I lasted from January 1, 2020, to June 30, 2021), mass vaccination had

218 just begun, and thus, did not significantly prevent excess mortality. In the second period, combining  
219 Delta and Omicron BA.1 infection waves (time interval II lasted from July 1, 2021 to March 30, 2022),  
220 vaccination became widespread, potentially playing a significant role in reducing excess mortality  
221 rates. In the third period, after the Omicron BA.1 wave (time interval III lasted from April 1, 2022, to  
222 April 30, 2023), the bulk of the population acquired immunity through direct COVID-19 infection,  
223 vaccination, or hybrid immunity (a combination of both). As a result, the association between high  
224 vaccination rates and low mortality, if previously significant, may become weak or disappear  
225 altogether.

226 We employed odds ratio analysis to compare the likelihood of death in one category of states  
227 to another and to quantify the association between vaccination rates and mortality. The results of our  
228 analysis, conducted over distinct periods, are consistent with our predictions, and are presented in  
229 Figure 3. Initially, during the pre-Delta period, the differences between states with the slowest and  
230 fastest vaccination rates were significant, but not very pronounced (OR=1.41, 95% CI 1.32–1.5,  
231  $p<0.01$ ), boxplots in Figure 3A illustrate this difference for state categories created according to  
232 vaccination rates. However, as widespread mass vaccination took place during the Delta period, the  
233 disparities between states with the slowest and fastest vaccination rates became more prominent  
234 (OR=1.8, 95% CI 1.66–1.92,  $p<0.01$ ), as demonstrated in Figure 3B.

235 Importantly, no substantial differences in excess mortality were observed between state  
236 categories in the post-Omicron BA.1 period, when a significant proportion of the population across all  
237 states likely attained seroconversion through the combination of vaccination and prior COVID-19  
238 infection (Figure 3C).

239 *States with higher vaccination rates tend to have higher GDP per capita and longer life expectancies*

240 In the previous subsection, we demonstrated that states with faster vaccination rates have lower  
241 excess mortality, with the most pronounced effect observed during the period of the pandemic  
242 dominated by the Delta and Omicron BA.1 variants. However, this reduction in mortality cannot be  
243 attributed solely to differences in vaccination rates. As shown in Figure 4, these states differ  
244 significantly in GDP per capita (Figure 4A) and life expectancy (Figure 4B). States with higher  
245 vaccination rates tend to have higher GDP and longer life expectancy, both of which are significantly  
246 negatively correlated with mortality. Therefore, the individual and combined contributions of these  
247 factors in determining excess mortality should be considered, weighted, and studied both together and  
248 independently.

#### 249 *A complex interplay between vaccination and economic status of U.S. states*

250 Fewer excess deaths happened in states with higher GDP per capita and higher vaccination  
251 rates. Figure 5 illustrates this effect for excess mortality during the combined Delta and Omicron BA.1  
252 variant periods, while Supplementary Figure 3 shows this effect separately for the Delta and Omicron  
253 BA.1 variants. This result is not surprising, as states with higher incomes achieved faster vaccination  
254 rates, and the relationship between these factors is significant ( $R=0.4$ ,  $p<0.05$ ). Both lower vaccination  
255 rates and lower GDP drive higher mortality across states; however, there are nuances in these trends.

256 Among the states with GDP per capita at or below \$65,000, age-unadjusted excess mortality  
257 has a stronger negative correlation with state income compared to those with higher income (Figure  
258 5A). Moreover, with the same level of low vaccination, states with GDP above \$65,000 have lower  
259 mortality compared to their less wealthy counterparts (Figure 5B). Two factors high vaccination rates  
260 and high income appear to have synergetic effects on lowering mortality across states. This synergy is  
261 also evident in multivariable regression analysis, where age unadjusted pandemic mortality is the

262 dependent variable while vaccination rate, and GDP are independent variables. Both parameters remain  
263 significant (Supplementary Table 2).

264 However, age adjustment for estimates of mortality changes the picture: the synergy of two  
265 parameters in defining excess mortality disappears. The same level of low vaccination corresponds to  
266 the same level of excess deaths, regardless of GDP (compare Supplementary Figure 4 A and Figure 4  
267 B). Thus, a high vaccination rate is the most crucial factor in defining low age-adjusted excess  
268 mortality, overriding the impact of GDP.

269 ***The importance and significance of mortality predictors changes throughout the pandemic periods***

270 Multivariable regression models indicated that life expectancy, vaccination coverage, and GDP  
271 significantly influenced age-unadjusted mortality that was estimated for all pandemic periods combined  
272 (Figure 5C). However, the relative importance of these factors shifted as the pandemic progressed.  
273 Early on, before widespread vaccination, pre-pandemic life expectancy was the strongest predictor of  
274 excess deaths (Figure 5D). With the emergence of the Delta variant and increased vaccination rates,  
275 vaccination coverage became the dominant factor, while the influence of life expectancy diminished  
276 (Figure 5D). This shift underscores the critical role of vaccination in reducing excess mortality during  
277 later stages of the pandemic, surpassing the impact of pre-existing health conditions. Notably, GDP  
278 remained a significant factor throughout the pandemic, with its importance increasing after the Delta  
279 variant's emergence.

280 However, for mortality that was estimated for all pandemic periods combined, and was adjusted  
281 for age, only vaccination coverage is a factor that is a significant contributor in a multivariable model,  
282 while life expectancy and GDP were not (Figure 5C).

283 Overall, the data emphasize the importance of vaccination in mitigating mortality but suggest  
284 that factors such as state-specific pre-pandemic life expectancy and economic status also play a role.  
285 Furthermore, the data show that age-adjusted and unadjusted excess mortality estimates are influenced  
286 by different parameters, though high vaccination rates minimize both.

## 287 **Discussion**

### 288 *Age-adjusted and unadjusted excess mortality estimates: similarities, differences, and importance in* 289 *evaluating pandemic impact*

290 When comparing Figure 1A and Figure 1B, it is evident that the correlation between age-  
291 unadjusted pandemic excess mortality and state-specific life expectancy is stronger than the correlation  
292 with age-adjusted mortality. This stronger correlation can be attributed to the influence of population  
293 age structure on both life expectancy and age-unadjusted pandemic excess mortality. The shared impact  
294 of population age structure explains the stronger correlation observed. Age-adjustment standardized the  
295 mortality rates to a common age structure, allowing for a more accurate comparison between states  
296 with different age demographics. Thus, unadjusted mortality that strongly correlates with life  
297 expectancy paints a broad picture. Age-adjusted mortality provides a more nuanced view (23),  
298 weakening the correlation but still showing a connection due to underlying factors impacting both  
299 measures.

300 Examining both unadjusted and age-adjusted mortality paints a more nuanced picture of the  
301 pandemic's impact. Unadjusted mortality provides a raw count of lives lost, crucial for understanding  
302 the overall burden on each state. Age-adjusted mortality, however, helps us assess how effectively states  
303 managed the pandemic relative to their population's vulnerabilities. As Figure 1C illustrates, these  
304 mortality estimates are correlated, likely due to factors like healthcare access, poverty, and lifestyle  
305 choices. These factors can influence both mortality rates and life expectancy. If a state has poor

306 healthcare, we expect higher excess mortality rates and a lower life expectancy. So, even when adjusted  
307 for age structure, these underlying factors will still contribute to a connection between the two  
308 estimates. However, such underlying factors impacting both estimates are more pronounced in states  
309 with lower GDP. In contrast, states with higher GDP often have better healthcare systems and social  
310 safety nets, leading to lower mortality rates across all age groups.

311 It is not surprising that in the category of states with GDP below the certain threshold life  
312 expectancy correlates with state economic well-being as illustrated in Figure 1 D. For states with GDP  
313 exceeding \$65,000 per capita, the correlation between economic well-being and life expectancy  
314 weakens, suggesting limited additional life expectancy gains from further economic growth.

315 Our current study results related to US states align with a similar pattern observed in our  
316 previous analysis of European countries (11). This pattern reveals that the relative importance of GDP  
317 and vaccination rates in predicting age unadjusted excess mortality shifted with economic context. In  
318 countries or states with lower income levels, GDP played a more prominent role, compared to its role  
319 in countries or states with higher economic status. However, age-adjusted mortality correlates and  
320 therefore likely depends only on vaccination rates. The higher vaccination rates the lower mortality  
321 estimates.

322 Why do countries or states with lower economic capacity demonstrate higher age-unadjusted  
323 pandemic-associated fatalities, even if they have similarly high vaccination coverage as other countries  
324 or states? A plausible explanation for this phenomenon is that states with lower GDPs, compared to  
325 those with higher GDPs, had fewer effective measures to complement vaccination in preventing  
326 COVID-19 infections. The deficiency in these measures contributed to the higher mortality rates  
327 observed in these states.

328 ***Vaccination rates strongly correlate with pre-pandemic life expectancy across US states.***

329           Several contributing factors explain this correlation. Both metrics reflect a state’s healthcare  
330 system capacity and its ability to adapt to crises. Additionally, strong public trust and a population  
331 willing to comply with public health measures play a role. Indeed, pre-pandemic life expectancy is  
332 highly and significantly inversely correlated with vaccination hesitancy estimated during the pandemic.  
333 This suggests a form of synergy between state governments and their residents. Effective government  
334 action to combat the pandemic is met with greater public cooperation, including low vaccine hesitancy  
335 that resulted in high vaccination uptake.

336 ***Association between high vaccination coverage and excess mortality disappeared following the***  
337 ***dominance of Omicron BA.1 virus variant.***

338           Our analysis demonstrates a progressively stronger association between low vaccination rates  
339 and high excess mortality that peaked during the Delta period. Eventually, death rates converge across  
340 states in the post-Omicron BA.1 period, due to widespread seroconversion from natural infections. In  
341 the period following the dominance of Omicron BA.1, a considerable proportion of the population in  
342 all states had already achieved immunity, which in states with low vaccination rates was offset by high  
343 rates of natural infections. These infections resulted in excess deaths, but also contributed to a  
344 strengthening of population immunity and this strengthening may have been substantial because of the  
345 considerable number of infections that had occurred by the end of March 2022 in most states. Highly  
346 likely that all states had achieved a comparable level of immunity by that point.

347           The findings from our analysis of both European countries and U.S. states offer insights for  
348 shaping strategies in future pandemics or infections surges of a lesser degree. Understanding the



349 patterns observed can inform proactive measures to mitigate the impact, particularly in regions with  
350 lower economic capacities.

## 351 **Conclusions**

- 352       • **States with lower life expectancy tend to have much higher pandemic-related deaths.**
- 353       • **Economic well-being (GDP) influences life expectancy, but with a potential threshold**  
354       **effect.** In this study the GDP threshold was defined as a value of \$65,000 per capita for  
355       2020. Once a state achieves a certain level of economic well-being, its life expectancy does  
356       not change significantly with further increases in GDP.
- 357       • **Economic well-being (GDP) also plays a role in reducing excess mortality that is not**  
358       **adjusted for age**, but its importance varies depending on state income level. In states with  
359       GDP per capita below the threshold, there's a stronger negative correlation between GDP  
360       and mortality, while in remaining states, vaccination rates have a more prominent effect.
- 361       • **Vaccination rates play a most significant role in reducing excess mortality.** This effect  
362       is consistent across states regardless of income level. Notably, in multivariable regression  
363       models, only vaccination rate, and not GDP remained as a significant factor affecting age-  
364       adjusted pandemic mortality. The category of front-runner states with the fastest vaccination  
365       campaigns that other states can model includes Vermont, Connecticut, Maine, Rhode Island,  
366       Massachusetts, New Jersey, Maryland, and New York.

367 **Author Contributions:** OM - data curation, formal analysis, research, writing, figures design; AO  
368 - statistical analysis, conceptualization; SS - conceptualization, statistical analysis, methodology,  
369 writing. All authors contributed to the article and approved the submitted version.

370 **Funding:** This work was funded by the Intramural Research Program of the National Library of  
371 Medicine, National Institutes of Health (AYO and SAS).

## 372 **Figure Legends**

373 **Figure 1. Exploring relationships between state-specific pandemic mortality, life expectancy, and**  
374 **GDP per capita** Mortality calculated from January 1, 2020, to July 31, 2022. The Pearson correlation  
375 coefficients displayed above the scatterplots indicate statistically significant correlations ( $p < 0.05$ ).

376 (A) Relationship of age-unadjusted pandemic mortality vs. state life expectancy. (B) Relationship of  
377 age-adjusted pandemic mortality vs. state life expectancy. (C) Relationship of age-unadjusted vs. age-  
378 adjusted state specific mortalities. (D) Relationship of state life expectancy vs GDP.

379 **Figure 2. Visualization of pandemic mortality waves/periods and vaccination rates** (A) A timeline  
380 of daily diagnosed COVID-19 deaths was created using the OWID database and presented along with  
381 a scheme of the dominant virus variants causing infections. (B) States were categorized into three  
382 groups based on their vaccination coverage in ascending order by October 2021. The "fast" category  
383 (light blue background) consists of states that had achieved a vaccination rate of 60% for residents by  
384 October 2021 and 70% by January 2022. The "slow" category (light pink background) includes states  
385 in which more than half of the residents remained unvaccinated as of October 2021. The remaining  
386 states are placed in the intermediate category (with a purple background). All states and Puerto Rico  
387 are shown in the order of the increasing percentage of the state population that had received the primary  
388 series of the vaccine as of October 2, 2021. (C) Pandemic excess mortality not adjusted for age relative  
389 to the state's population in different pandemic periods.

390 **Figure 3. Excess mortality distributions in states categorised according to vaccination rates.** States  
391 were categorized in the same manner as described in the legend of Figure 2, and each state's excess

392 mortality estimate (not adjusted for age) was plotted within each category: (A) For the pre-Delta period,  
393 which corresponds to the initial phase of vaccination. (B) For the Delta and Omicron BA.1 period,  
394 representing an advanced stage of vaccination. (C) For the post-Omicron BA.1 period.

395 **Figure 4. The distribution of GDPs per capita and life expectancy in states categorized as fast,**  
396 **intermediate, and slow according to vaccination rate.** States were categorized in the same manner  
397 as described in the legend of Figure 2. GDP and life expectancy were estimated for each state within  
398 each category and resulting estimates are presented as box-plots. Means with standard deviation are  
399 shown for each category in the relevant box-plots. (A) The distribution of states according to GDP  
400 per capita, (B) The distribution according to life expectancy at birth.

401 **Figure 5. Regression analysis of pandemic excess mortality and key parameters that affected it**  
402 The top panels display results of univariable regression analysis as scatter plots. Pearson correlation  
403 coefficients, indicating significant relationships ( $p < 0.05$ ), are shown above the plots. Here, the  
404 dependent variable is age-unadjusted excess mortality, with independent variables being: (A) Real GDP  
405 per capita for 2020. (B) Vaccination rate, as the percentage of the population fully vaccinated with the  
406 primary series by October 2, 2021. The bottom panels present results of multivariable regression  
407 analysis as vertical columns, reflecting negative log-transformed significance values of three key input  
408 parameters. In all models, pandemic mortalities are the dependent variables, while life expectancy,  
409 vaccination coverage, and annual GDP per capita are independent variables. For these models: (C)  
410 Mortality for all pandemic periods combined, adjusted for age in model 1, and unadjusted for age in  
411 model 2. (D) Age-unadjusted mortality for two pandemic periods: Model 4 represents the pre-Delta  
412 and pre-mass vaccination period of the pandemic, while Model 5 represents the Delta variant  
413 dominance and mass vaccination period.

414 **Supplementary Figure 1. Relationships between state-specific pandemic mortality, and GDP per**  
415 **capita** Excess mortality was calculated as the percentage of normalized excess deaths for the state  
416 population from January 1, 2020, to July 31, 2022. The Pearson correlation coefficients displayed above  
417 the scatterplots indicate statistically significant correlations ( $p < 0.05$ ). (A) Relationship of age-  
418 unadjusted pandemic mortality vs. GDP (B) Relationship of age-adjusted pandemic mortality vs. GDP.  
419 of age-unadjusted vs. age-adjusted state specific mortalities.

420 **Supplementary Figure 2. Chronological Emergence of SARS-CoV-2 Dominant Variants in the**  
421 **USA**

422 **Supplementary Figure 3. Correlation analysis of pandemic excess mortality for Delta and**  
423 **Omicron BA.1 periods separately** Only statistically significant correlations ( $p < 0.05$ ) are presented  
424 above the corresponding scatter plots. Excess mortality that was not adjusted for age is depicted for:  
425 (A) Delta period in relation to the annual actual GDP per capita in 2020. (B) Delta period in relation to  
426 vaccination rates, expressed as a percentage of the state's fully vaccinated population as of October 2,  
427 2021. (C) Omicron BA.1 period in relation to GDP per capita. (D) Omicron BA.1 period in relation to  
428 vaccination rates, calculated as a percentage of the state's fully vaccinated population as of January 2,  
429 2022. (E) Omicron BA.1 period in relation to booster administration rates, calculated as a percentage  
430 of the state's population that received an additional dose as part of the primary vaccine series as of  
431 January 2, 2022.

432 **Supplementary Figure 4. Comparison of relationships of vaccination coverages with pandemic**  
433 **excess mortality estimated with and without adjustment for age** Both estimates were performed  
434 for the period spanning from January 1, 2020, to July 31, 2023. State vaccination coverage was  
435 estimated as October 2, 2021. Pearson correlation coefficients reflecting significant relationships ( $p <$

436 0.05) are shown above the scatter plots. (A) The dependent variable is excess mortality, not adjusted for  
437 age. (B) The dependent variable is age-adjusted excess mortality.

## 438 **References**

- 439 1. Nie R, Abdelrahman Z, Liu Z, Wang X. Evaluation of the role of vaccination in the COVID-19  
440 pandemic based on the data from the 50 U.S. States. *Comput Struct Biotechnol J*. 2022;20:4138-45.
- 441 2. Barro RJ. Vaccination rates and COVID outcomes across U.S. states. *Econ Hum Biol*.  
442 2022;47:101201.
- 443 3. Bilinski A, Thompson K, Emanuel E. COVID-19 and Excess All-Cause Mortality in the US and  
444 20 Comparison Countries, June 2021-March 2022. *JAMA*. 2023;329(1):92-4.
- 445 4. Du H, Saiyed S, Gardner LM. Association between vaccination rates and COVID-19 health  
446 outcomes in the United States: a population-level statistical analysis. *BMC Public Health*.  
447 2024;24(1):220.
- 448 5. Sah P, Vilches TN, Pandey A, Schneider EC, Moghadas SM, Galvani AP. Estimating the impact  
449 of vaccination on reducing COVID-19 burden in the United States: December 2020 to March 2022. *J*  
450 *Glob Health*. 2022;12:03062.
- 451 6. Shioda K, Chen Y, Collins MH, Lopman BA. Population-Level Relative Effectiveness of the  
452 COVID-19 Vaccines and the Contribution of Naturally Acquired Immunity. *J Infect Dis*. 2022.
- 453 7. Suthar AB, Wang J, Seffren V, Wiegand RE, Griffing S, Zell E. Public health impact of covid-  
454 19 vaccines in the US: observational study. *BMJ*. 2022;377:e069317.
- 455 8. Cuadros DF, Gutierrez JD, Moreno CM, Escobar S, Miller FD, Musuka G, et al. Impact of  
456 healthcare capacity disparities on the COVID-19 vaccination coverage in the United States: A cross-  
457 sectional study. *Lancet Reg Health Am*. 2023;18:100409.

- 458 9. Bollyky TJ, Castro E, Aravkin AY, Bhangdia K, Dalos J, Hulland EN, et al. Assessing COVID-  
459 19 pandemic policies and behaviours and their economic and educational trade-offs across US states  
460 from Jan 1, 2020, to July 31, 2022: an observational analysis. *Lancet*. 2023;401(10385):1341-60.
- 461 10. Basak P, Abir T, Al Mamun A, Zainol NR, Khanam M, Haque MR, et al. A Global Study on the  
462 Correlates of Gross Domestic Product (GDP) and COVID-19 Vaccine Distribution. *Vaccines*.  
463 2022;10(2):266.
- 464 11. Matveeva O, Shabalina S. Comparison of vaccination and booster rates and their impact on  
465 excess mortality during the COVID-19 pandemic in European countries. *Front Immunol*. 2023;44.
- 466 12. Moradpour J, Shajarizadeh A, Carter J, Chit A, Grootendorst P. The impact of national income  
467 and vaccine hesitancy on country-level COVID-19 vaccine uptake. *PLoS One*. 2023;18(11):e0293184.
- 468 13. Collaborators GBDD. Global age-sex-specific mortality, life expectancy, and population  
469 estimates in 204 countries and territories and 811 subnational locations, 1950-2021, and the impact of  
470 the COVID-19 pandemic: a comprehensive demographic analysis for the Global Burden of Disease  
471 Study 2021. *Lancet*. 2024;403(10440):1989-2056.
- 472 14. Andrasfay T, Goldman N. Reductions in US life expectancy during the COVID-19 pandemic  
473 by race and ethnicity: Is 2021 a repetition of 2020? *PLoS One*. 2022;17(8):e0272973.
- 474 15. Centers for Disease Control and Prevention. National Center for Health Statistics. Life  
475 Expectancy at Birth by State,  
476 [https://www.cdc.gov/nchs/pressroom/sosmap/life\\_expectancy/life\\_expectancy.htm](https://www.cdc.gov/nchs/pressroom/sosmap/life_expectancy/life_expectancy.htm), accessed March 9,  
477 2024
- 478 16. National Center for Health Statistics. Excess Deaths Associated with COVID-19.  
479 <https://data.cdc.gov/d/xkkf-xrst>, accessed July 18, 2023.

- 480 17. CensusBureau. Annual Estimates of the Resident Population for the United States, Regions,  
481 States, District of Columbia, and Puerto Rico: April 1, 2020, to July 1, 2022 (NST-EST2022-POP),  
482 Source: U.S. Census Bureau, Population Division, Release Date: December 2022.  
483 <https://www.census.gov/data/tables/time-series/demo/popest/2020s-state-total.html>, accessed July 19,  
484 2023.
- 485 18. US Centers for Disease Control and Prevention, Excess Deaths, Technical notes: accessed  
486 September 7, 2023. [https://www.cdc.gov/nchs/nvss/vsrr/covid19/excess\\_deaths.htm#techNotes](https://www.cdc.gov/nchs/nvss/vsrr/covid19/excess_deaths.htm#techNotes).
- 487 19. US Centers for Disease Control and Prevention, COVID-19 Vaccinations in the United States,  
488 Jurisdiction, [https://data.cdc.gov/Vaccinations/COVID-19-Vaccinations-in-the-United-States-](https://data.cdc.gov/Vaccinations/COVID-19-Vaccinations-in-the-United-States-Jurisdi/uns-k-b7fc)  
489 [Jurisdi/uns-k-b7fc](https://data.cdc.gov/Vaccinations/COVID-19-Vaccinations-in-the-United-States-Jurisdi/uns-k-b7fc), accessed November 16, 2023.
- 490 20. Bureau of Economic Analysis, Gross Domestic Product by State,  
491 <https://apps.bea.gov/regional/histdata/releases/0322gdpstate/index.cfm>, accessed December 1, 2023.
- 492 21. Ruhter J. Office of Assistant Secretary for Planning and Evaluation (ASPE). Vaccine Hesitancy  
493 for COVID-19: State, County, and Local Estimates: [https://aspe.hhs.gov/reports/vaccine-hesitancy-](https://aspe.hhs.gov/reports/vaccine-hesitancy-covid-19-state-county-local-estimates)  
494 [covid-19-state-county-local-estimates](https://aspe.hhs.gov/reports/vaccine-hesitancy-covid-19-state-county-local-estimates), accessed April 8, 2024.
- 495 22. MedCalc Software Ltd, Odds ratio calculator. [https://www.medcalc.org/calc/odds\\_ratio.php](https://www.medcalc.org/calc/odds_ratio.php),  
496 accessed August 15, 2023.
- 497 23. Islam N, Jdanov DA. Age and sex adjustments are critical when comparing death rates. *BMJ*.  
498 2023;381:845.

## Figures

Figure 1.

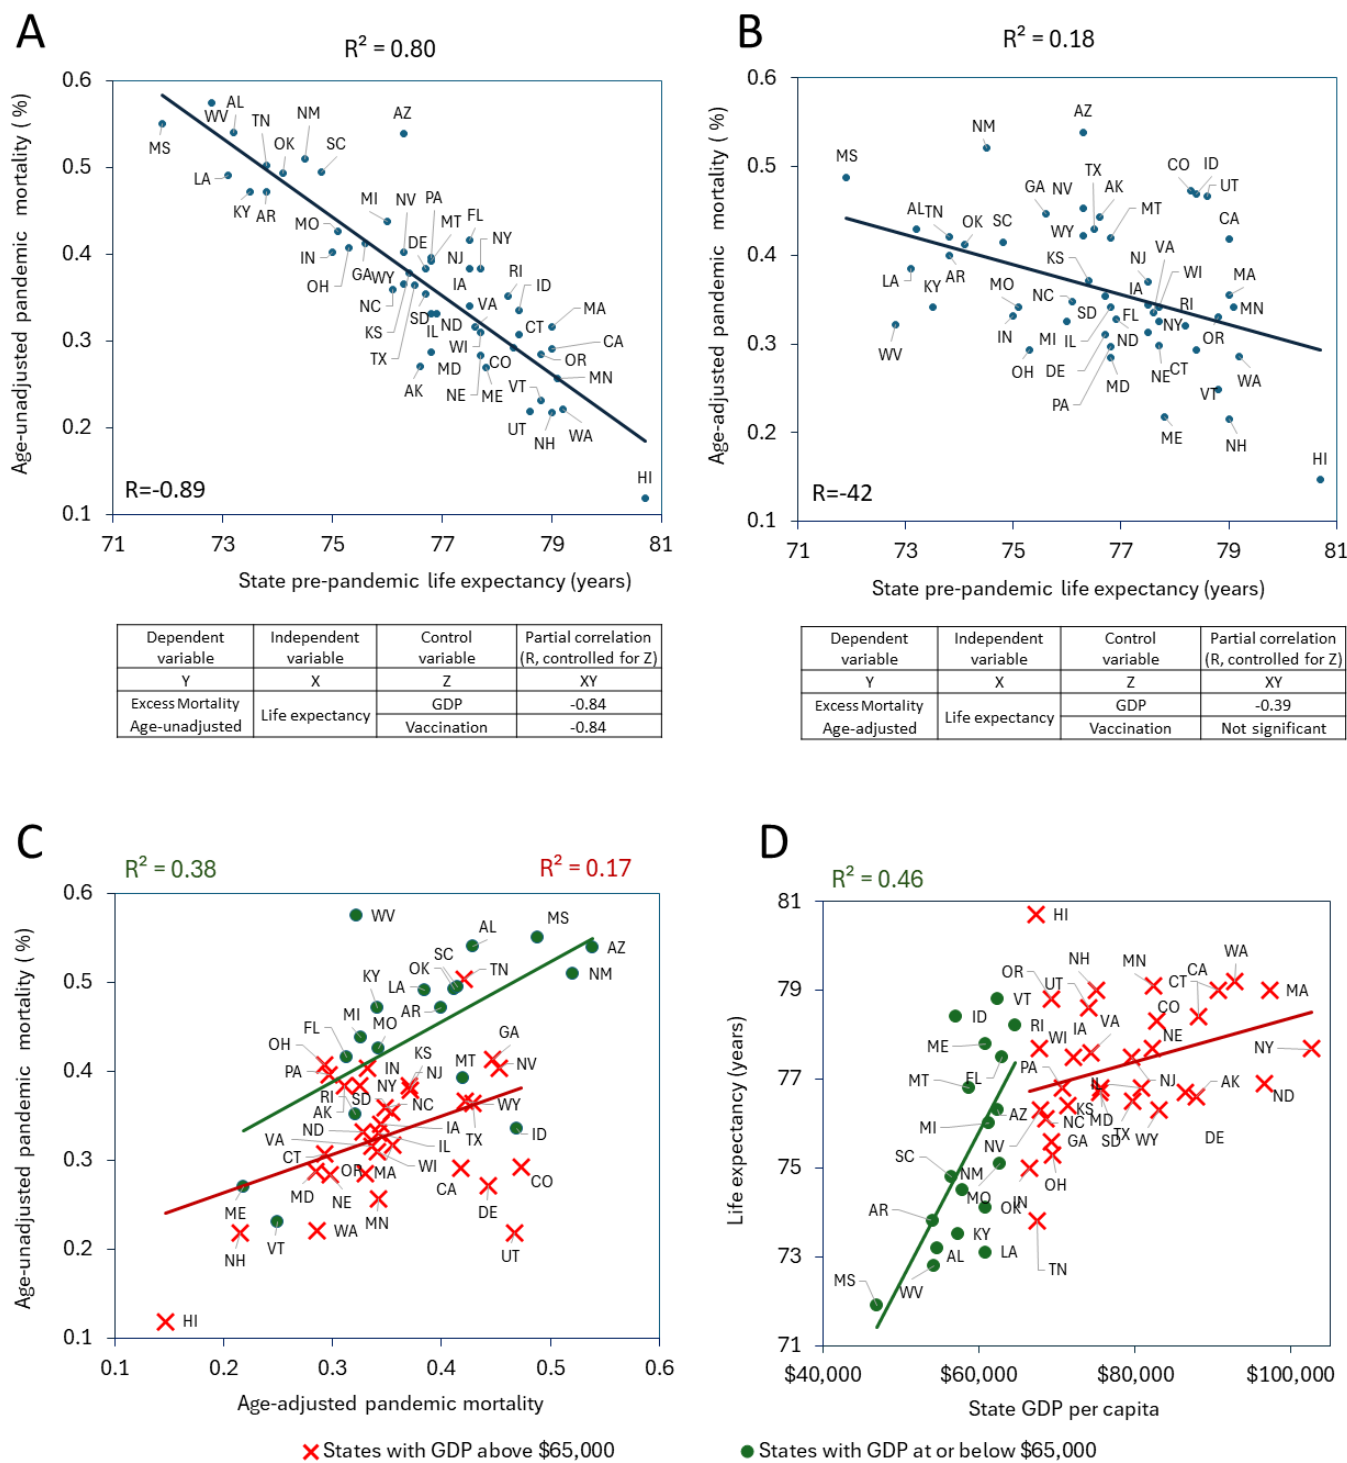



**Figure 2.**

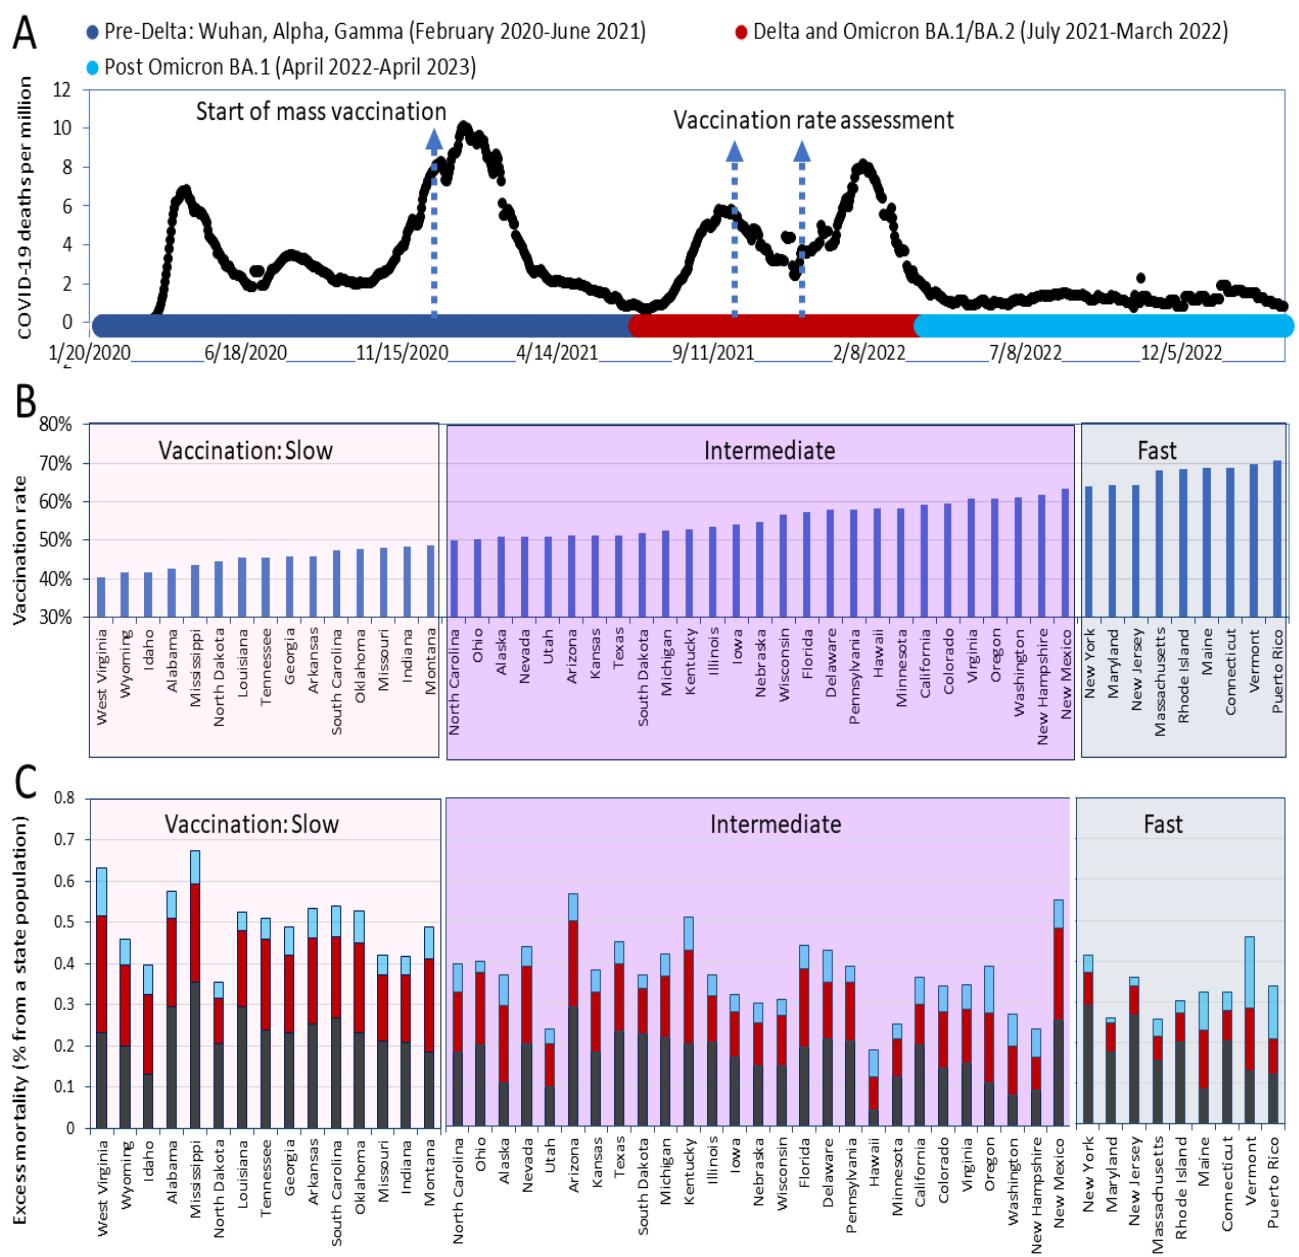

**Figure 3.**

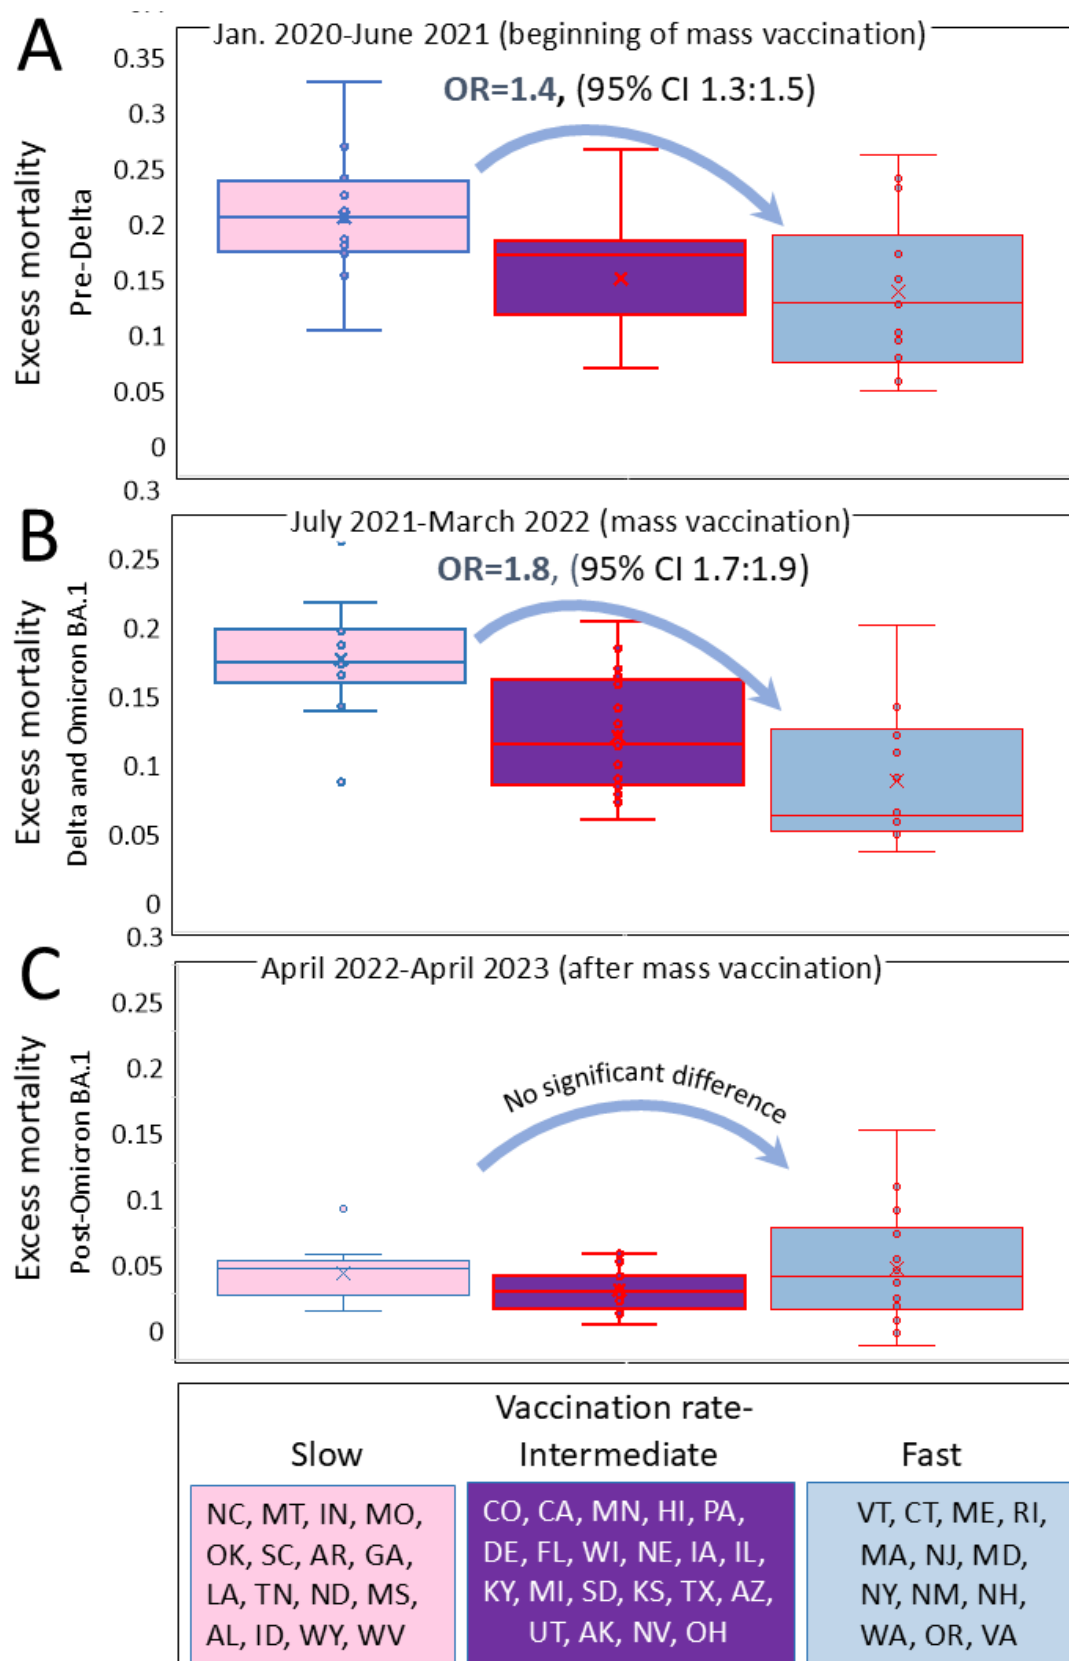

**Figure 4.**

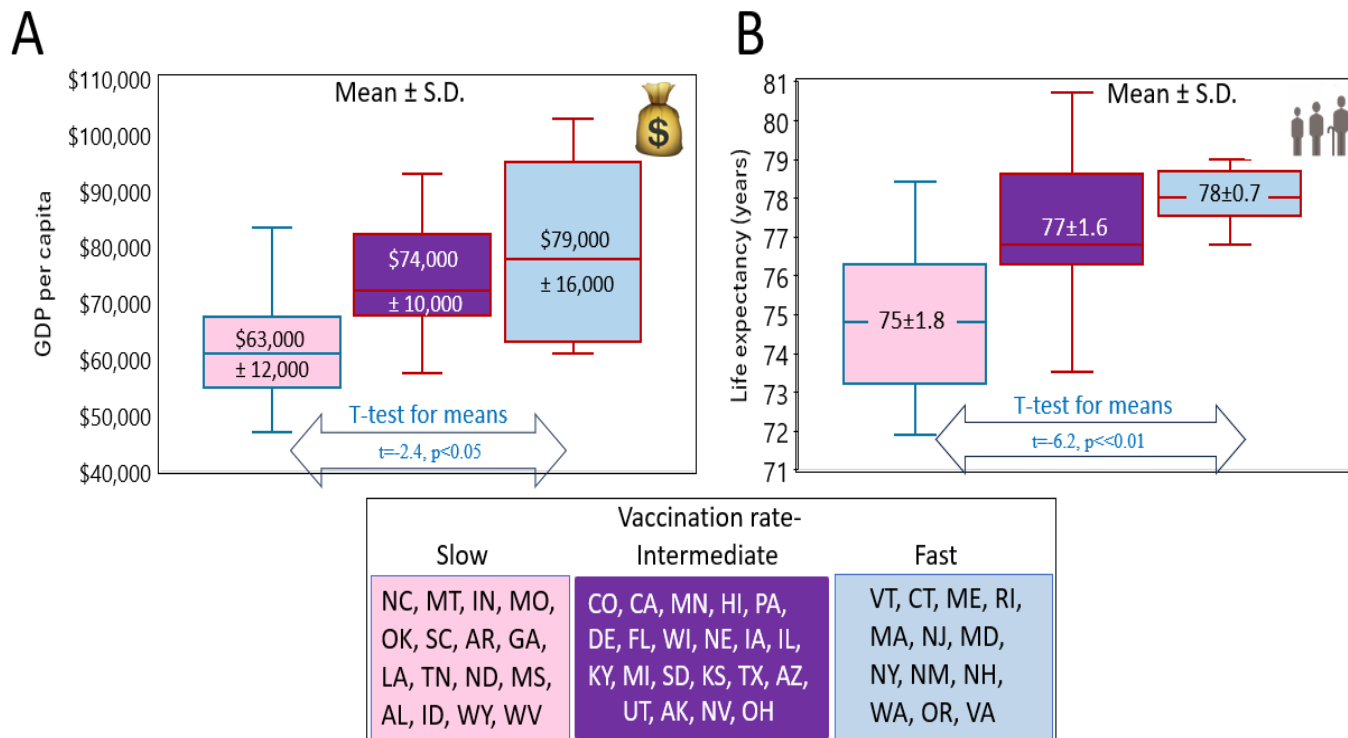

Figure 5.

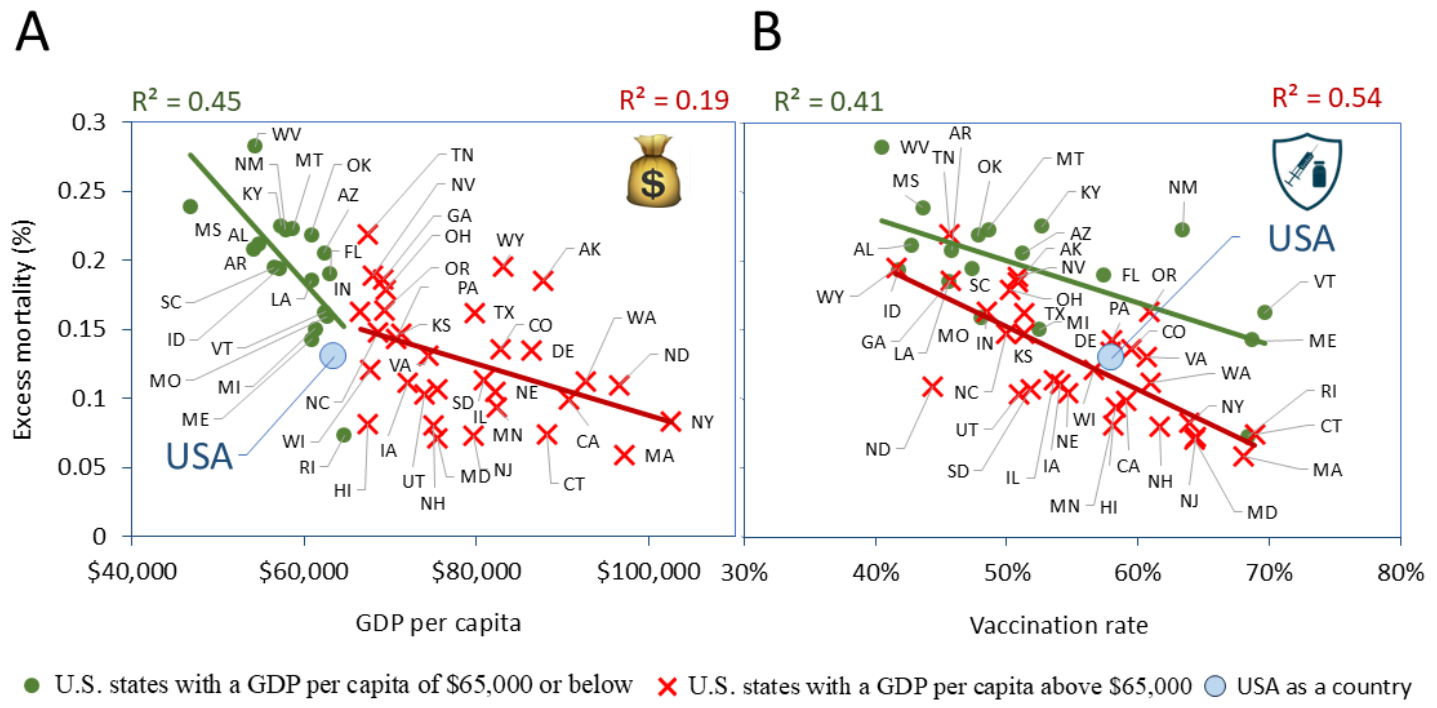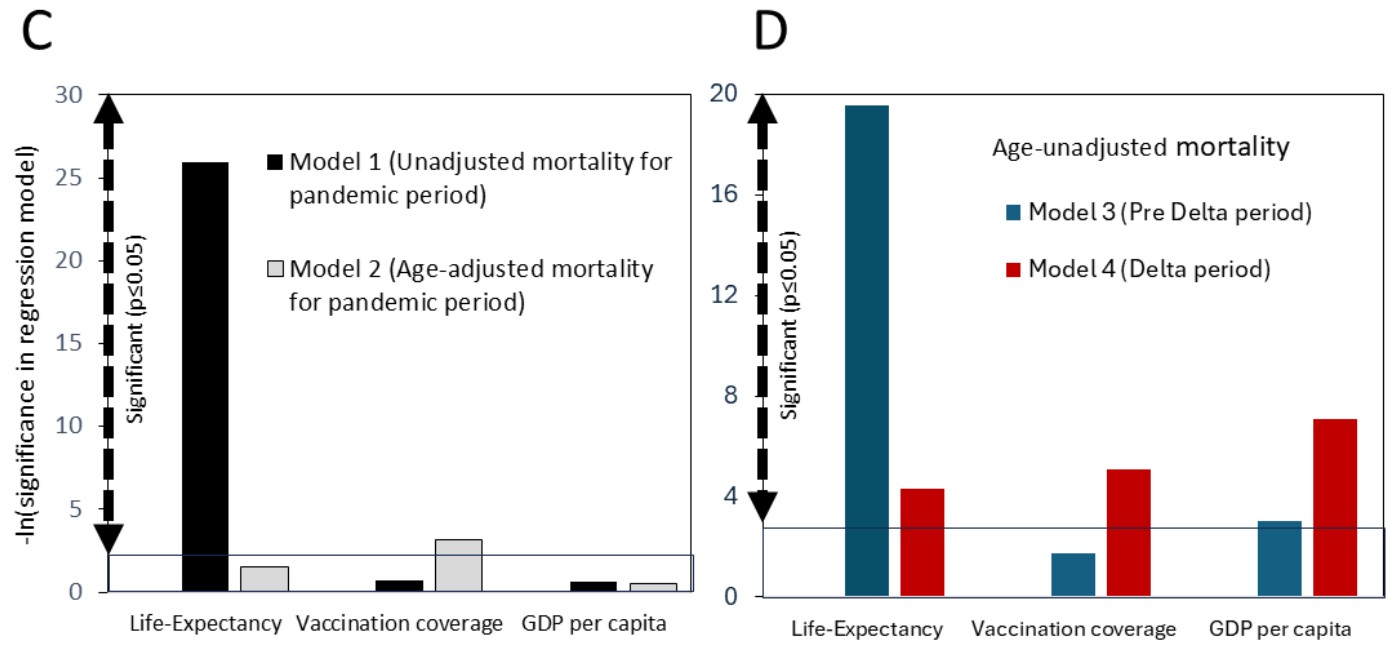

### Supplementary Figure 1.

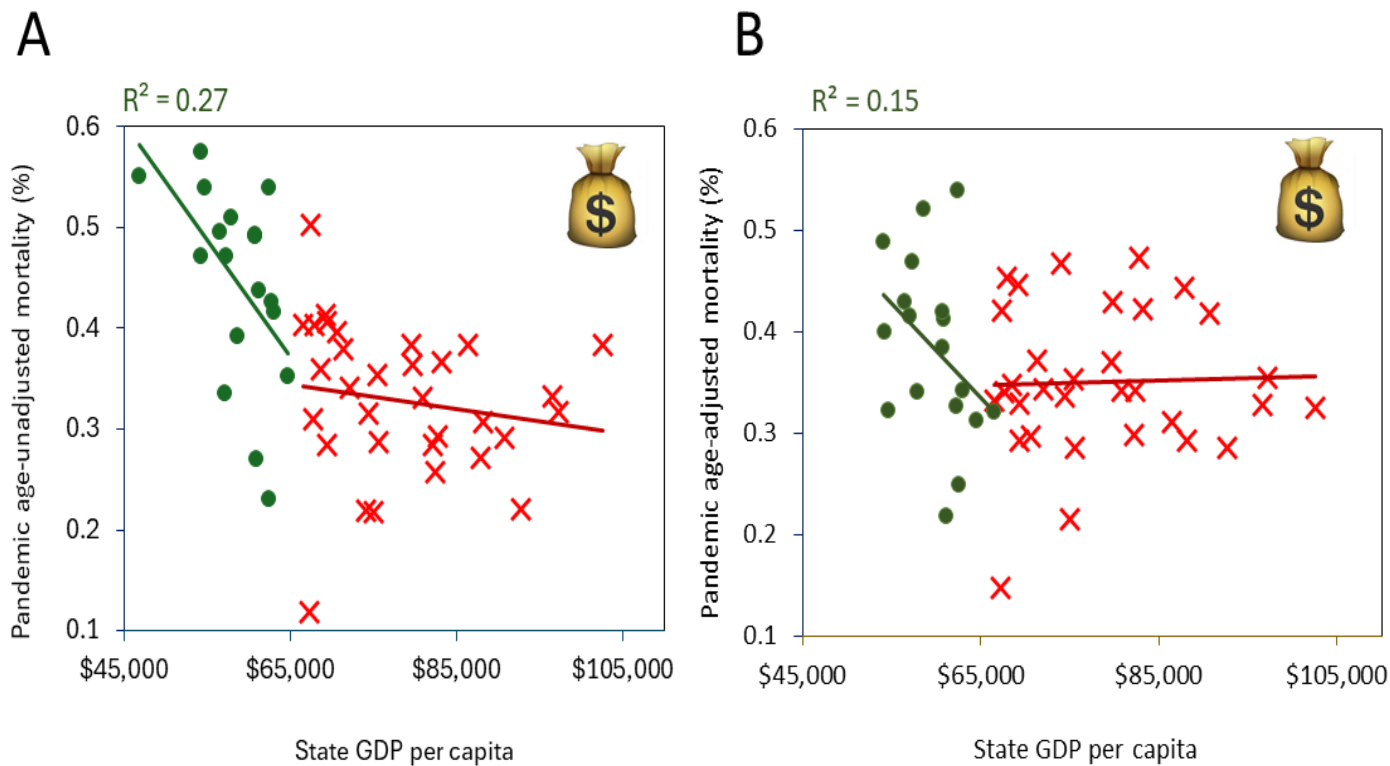

## Supplementary Figure 2.

### United States

SARS-CoV-2 sequences by variant, July 5, 2021

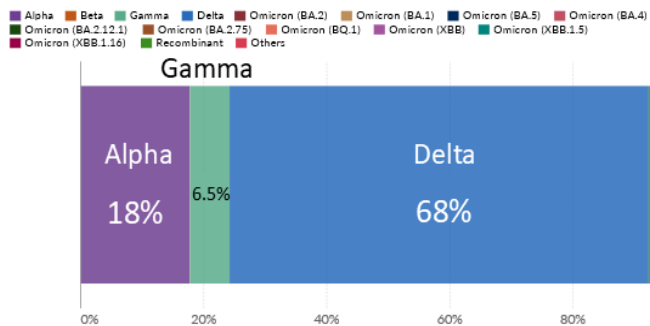

SARS-CoV-2 sequences by variant, January 3, 2022

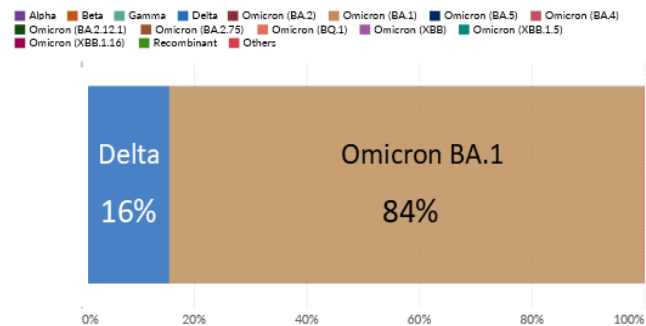

SARS-CoV-2 sequences by variant, January 31, 2022

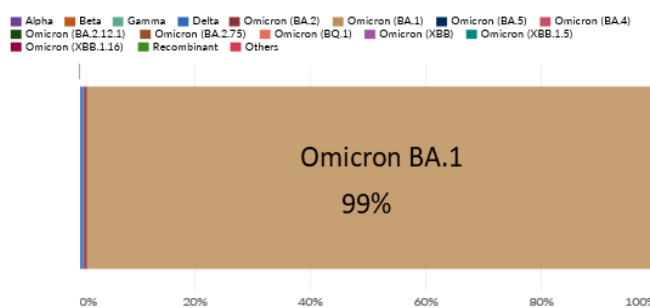

SARS-CoV-2 sequences by variant, March 3, 2022

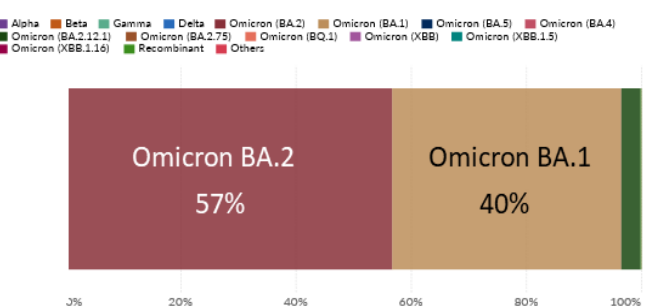

### Supplementary Figure 3.

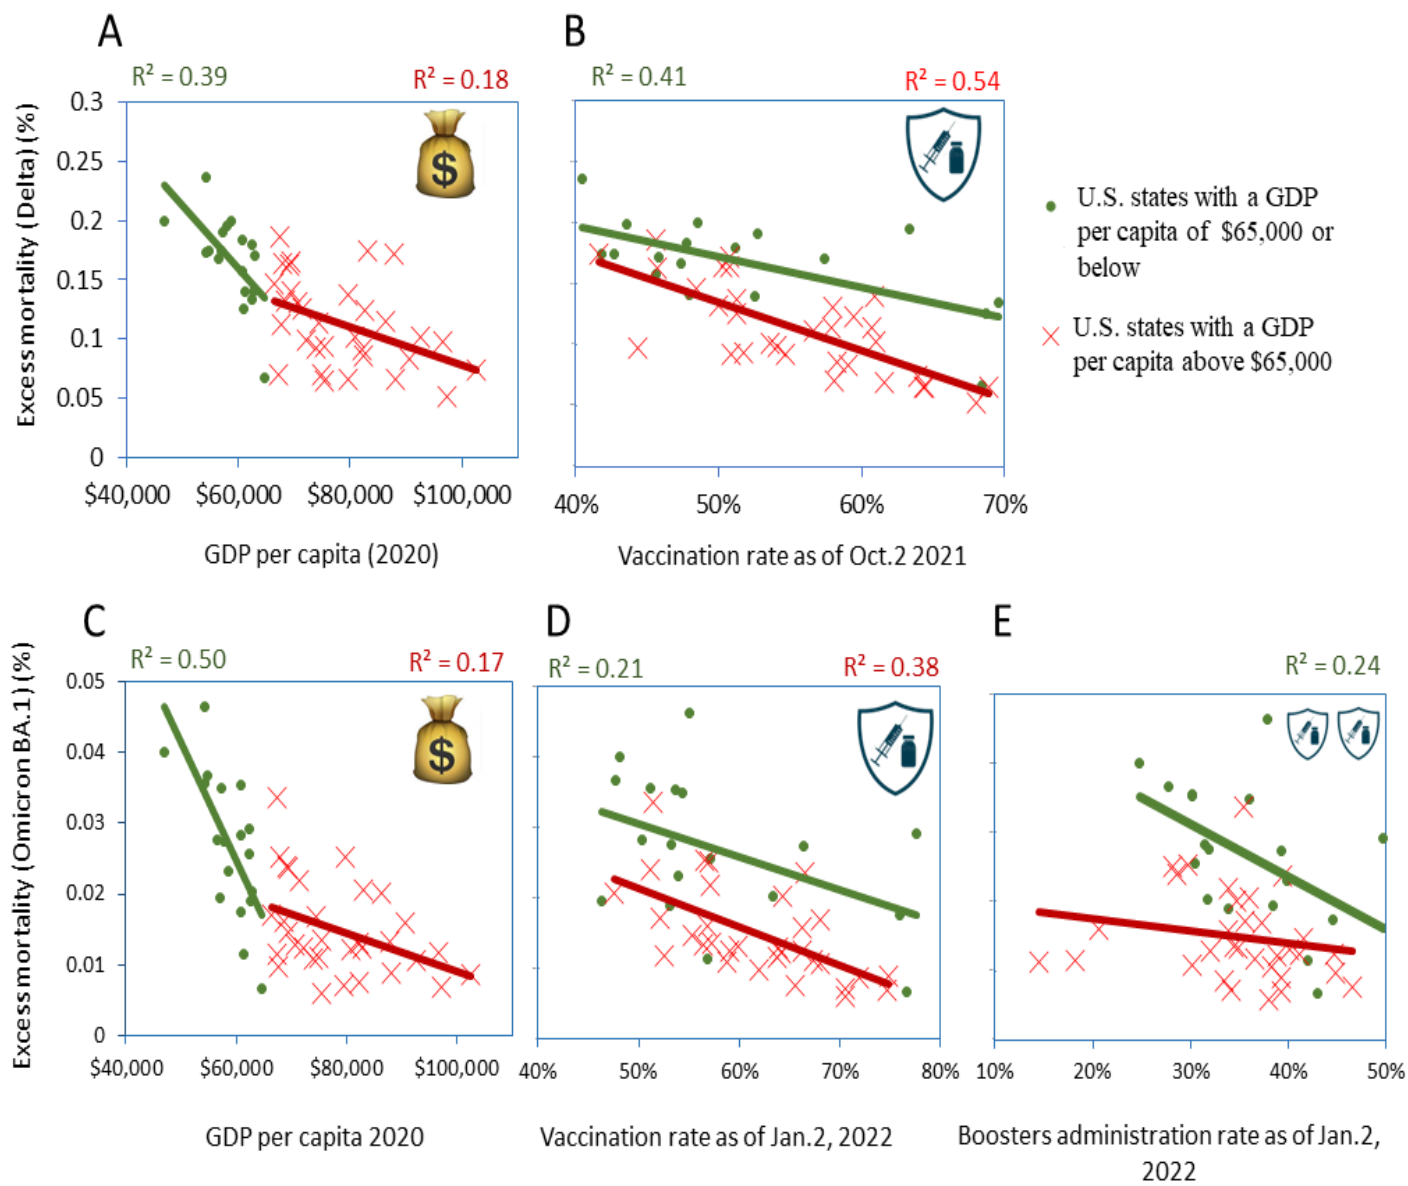

Supplementary Figure 4.

A

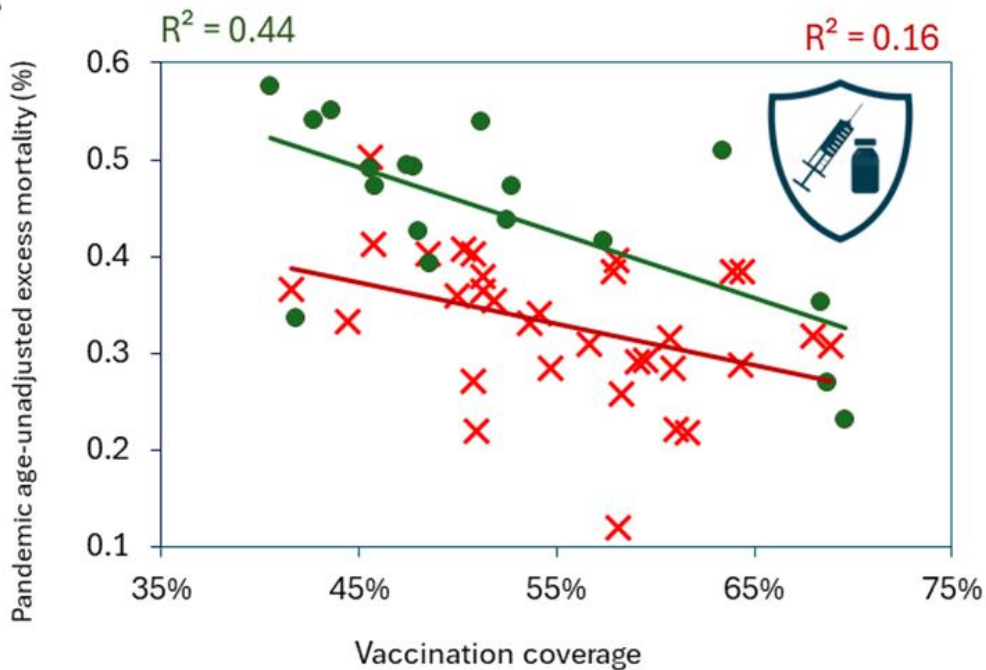

B

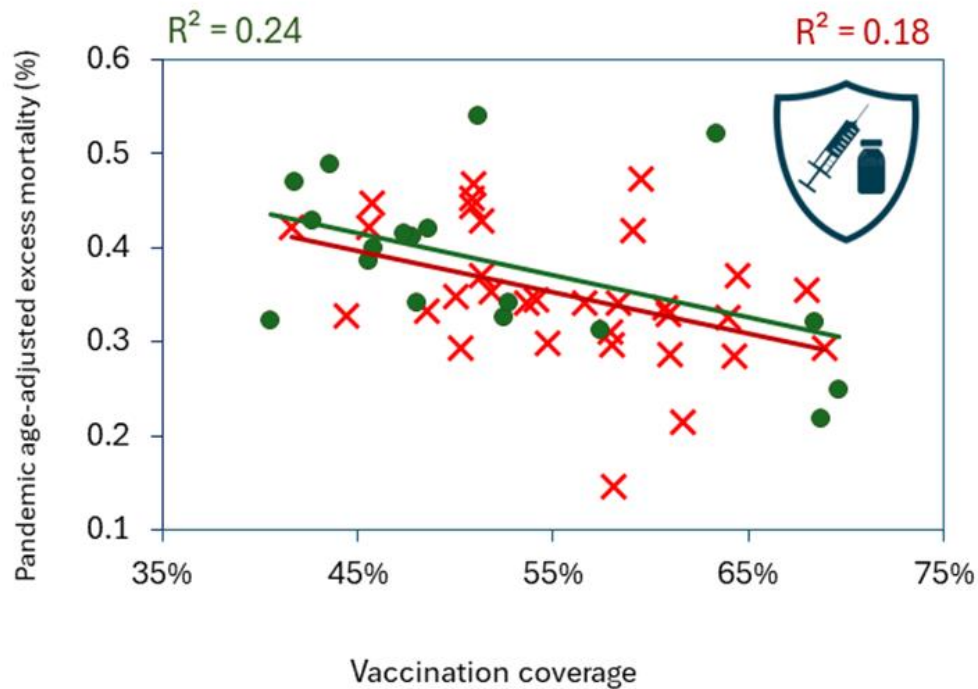

Source: https://medrxiv.org/content/10.1101/2024.01.21.24301582v2.full.pdf
